# Supplementary material
Source: publisher site journal article supplement (https://www.dovepress.com/article/369326)
Supplement: Supplementary file 1 [file get_supplementary_file.php]

**Supplementary tables**

**Table 1S.** Final model LS means of *Outcome 2* (the probability of CML relapse values accepted by patients after stop TKIs therapy) by *Disease phase* and by *Ever desired to stop* covariates

| **Covariate** | **Class** | ***Outcome 2* LS mean** | **SE** | **p** |
| --- | --- | --- | --- | --- |
| **Disease phase** | **2** | 81.05 | 26.90 | 0.003 |
| **3** | 37.15 | 4.82 | <0.001 |
| **4** | 37.31 | 5.18 | <0.001 |
| **5** | 44.93 | 5.39 | <0.001 |
| **6** | 9.82 | 18.67 | 0.600 |
| **1** | 71.77 | 13.64 | <0.001 |
| **Ever desired to stop** | **2** | 42.16 | 7.98 | <0.001 |
| **3** | 66.26 | 9.86 | <0.001 |
| **1** | 32.60 | 6.54 | <0.001 |

**C
Notes:** *Disease phase* (MCyR = 1, CCyR = 2, MMR = 3, MR4 = 4, MR4.5 = 5, MR5 = 6); *Ever desired to stop* (never = 1; sometimes = 2; often = 3).

**Abbreviations:** LS, Least-squares (LS); SE, Standard Error; TKI, Tyrosine Kinase Inhibitor.

**Table 2S.** The probability of CML relapse values accepted by patients after stop TKIs therapy *(Outcome 2)*, *RTC* and *SRT* values by *Disease phase* classes

| **Disease phase by class** | **n** | **Outcome 2** | | **RTC** | | **SIRI stimulating** | |
| --- | --- | --- | --- | --- | --- | --- | --- |
| **Mean** | **SD** | **Mean** | **SD** | **Mean** | **SD** |
| **2** | 1 | 75.00 | - | 47.00 | - | 18.00 | - |
| **3** | 47 | 25.64 | 28.85 | 54.87 | 12.12 | 20.17 | 4.018 |
| **4** | 35 | 28.86 | 30.94 | 54.80 | 8.75 | 20.77 | 4.26 |
| **5** | 29 | 35.52 | 29.68 | 55.24 | 11.27 | 20.62 | 4.06 |
| **6** | 2 | 0.00 | 0.00 | 63.00 | 2.83 | 22.50 | 2.12 |
| **1** | 4 | 67.50 | 17.56 | 47.00 | 11.80 | 23.00 | 2.94 |

**Notes:** *Disease phase* (MCyR = 1, CCyR = 2, MMR = 3, MR4 = 4, MR4.5 = 5, MR5 = 6).

**Abbreviations:** RTC,Resistance to Change;SIRI, Stimulating-Instrumental Risk Inventory; n, Number of Patients; SD, Standard Deviation; TKI, Tyrosine Kinase Inhibitor.

**Table 3S.** The probability of CML relapse values accepted by patients after stop TKIs therapy *(Outcome 2)*, *RTC* and *SRT* values by *Ever desired to stop* classes

| **Ever desired to stop by class** | **n** | **Outcome 2** | | **RTC** | | **SRT** | |
| --- | --- | --- | --- | --- | --- | --- | --- |
| **Mean** | **SD** | **Mean** | **SD** | **Mean** | **SD** |
| **2** | 15 | 45.33 | 33.35 | 54.13 | 10.96 | 24.33 | 4.12 |
| **3** | 12 | 59.58 | 28.72 | 49.75 | 7.84 | 20.00 | 3.30 |
| **1** | 91 | 24.12 | 27.06 | 55.51 | 11.09 | 20.03 | 3.80 |

**Notes:** *Ever desired to stop* (never = 1; sometimes = 2; often = 3).

**Abbreviations:** RTC,Resistance to Change; SRT, SIRI Stimulating Risk Taking; n, Number of Patients; SD, Standard Deviation; TKI, Tyrosine Kinase Inhibitor.
